# Supplementary material for: Trace Element and Isotope Systematics in Vent Fluids and Sulphides From Maka Volcano, North Eastern Lau Spreading Centre: Insights Into Three-Component Fluid Mixing
Source: Frontiers journal article supplement (doi:10.3389/feart.2021.776925), 2021-12-07
Supplement: Table_3.XLSX [file Table_3.XLSX]

## Sheet: Table A3
Table A3. Concentrations of major elements by EPMA and trace elements by LA-ICP-MS.
Locality	Sample #	Mineral	S	Fe	Cu	Zn	As	Ag	Cd	Sb	Te	Au	Pb	Total	V	Mn	Co	Ni	Cu	Zn	Ga	Ge	As	Se	Mo	Ag	Cd	In	Sn	Sb	Te	W	Au	Tl	Pb	Bi
			wt. %												ppm
LLD (lower limit of detection)															0.02	0.01	0.01	0.1	0.11	1.1	0.01	0.17	0.14	0.5	0.04	0.01	0.05	<0.01	0.05	0.01	0.07	0.01	0.01	<0.01	0.01	<0.01
Maka HF	116 ROV-17R	Pyrite I	53.055	46.138	0.083	0.045	0.044		0.075					99.44	18.45	3332.5	5.16	11.9	2936.92	3558.55	2.58	9.38	73.15	52.08	173.25	46.83	10.69	0.222	0.142	4.53	1.3	0.295	1.02	60.05	211.28	0.155
	116 ROV-17R	Pyrite I	53.494	45.647	0.106	0.014	0.008		0.034	0.017				99.32	21.79	3516.72	0.908	5.24	1059.34	652.12	0.17	2.94	54.44	36.86	232.16	19.41	2.32	0.0232		4.45	0.45	0.223	0.561	65.68	104.46	0.005
	116 ROV-13	Pyrite II	51.534	45.891	0.041		0.008	0.028	0.05		0.017			97.569	1.01	29.45	3889.37	3.57	1810.58	7.58	0.498	1.05	196.21	1481.02	6.01	0.352		0.159	0.462	0.501	71.83		0.137	0.176	6.47	11.43
	116 ROV-13	Pyrite II	52.378	46.057	0.062		0.013		0.045	0.011				98.566	0.372	22.66	739.9	0.38	1880		2.96	3.03	55.25	656.55	16.78	0.123	0.091	0.183	0.283	0.352	11.63	0.041	0.094	0.122	10.84	5.39
	116 ROV-13	Pyrite II	52.473	46.288		0.03	0.06	0.003	0.031		0.007			98.892	0.204	16.49	104.75		6.57	3.44		0.88	3.66	783.81				0.0084			4.82				0.604	0.057
	116 ROV-13	Pyrite II	51.888	46.211	0.161		0.053	0.006	0.054	0.025	0.002			98.4	0.58	18.92	3124.62	2.97	1131.84	6.5	0.085	1.34	469.88	1818.37	8.23	0.203		0.0057	0.379	0.715	69.81	0.085	0.156	1.68	15.18	15.99
	116 ROV-13	Pyrite II	51.41	45.515	0.358		0.022		0.053	0.035				97.393	0.284	16.62	5999.36	5.81	937.75	1.51	0.026	1.39	209.89	2370.88	2.87	0.031				0.082	99.22		0.022	0.102	1.73	5.77
	116 ROV-13	Pyrite II	52.793	46.516	0.157	0.008	0.024		0.019		0.005	0.073		99.595	0.295	16.85	704.03	2.86	857		0.211	1.56	50.21	650.6	1.09			0.116	0.435	0.074	47.38		0.034	0.0063	0.541	6.75
	116 ROV-13	Pyrite II	53.078	46.452	0.167	0.039	0.01		0.055	0.022	0.005			99.828	0.261	17.25	1340.48	2.61	690.69		0.207	1.88	30.64	690.26	0.77	0.034		0.0569			77.51	0.01	0.02		0.209	5.87
	116 ROV-17R	Pyrite II	53.271	46.726	0.09				0.064					100.151	19.34	1620.58	13.19	6.95	1647.23	1372.41	0.97	4.27	42.56	47.88	159.1	33.62	5.86	0.037		3.18	14.58	0.731	1.35	49.16	210.16	0.787
	116 ROV-17R	Pyrite II	52.037	45.829	0.694	0.023	0.051		0.032				0.021	98.687	2.05	26.81	82.36	1.24	3924.48	12.68	0.86	0.85	274.81	3944.2	16.01	2.71	0.34	0.895	1.29	2.79	493.67		0.171	0.43	22	4.11
	116 ROV-17R	Pyrite II	53.309	46.567	0.198	0.008			0.03				0.073	100.185	25.37	533.59	1.025	3.95	910.08	870.36	1.82	4.69	150.45	43.9	79.23	33.26	4.56	0.166	0.427	14.78	3.35	0.79	1.53	50.54	279.22	0.0231
	116 ROV-17R	Pyrite II	53.307	46.557	0.064	0.005	0.038		0.046					100.017	4.83	441.45	97.73	12.22	2101.06	409.69	2.82	3.86	104.27	19.41	201.09	25.72	1.66	0.305	0.167	24.26	8.16	0.48	1.01	29.1	120.26	0.728
	116 ROV-17R	Pyrite II	52.769	45.895	0.846	0.006	0.008		0.037					99.561	2.08	21.61	521.32	13.55	55950.8	16.52	11.38	3.4	320.85	2690.32	31.51	21.85		5.31	9.46	2.41	171.68	0.173	0.651	0.55	33.87	17.45
	116 ROV-17R	Pyrite II	52.106	45.767	1.772	0.011	0.033		0.038					99.727	2.3	25.33	18.45		192189	113.96	63.49	9.07	11.28	1765.18	18.4	29.47	2.21	11	20.64	0.44	10.04		0.145	0.151	5.76	6.94
	116 ROV-17R	Pyrite II	53.69	46.617		0.027			0.048	0.021				100.403	2.31	90.21	0.985	0.27	177.25	15.76	0.076	1.15	567.63	2.55	17.06	12.85		0.098		9.23		0.091	4.11	0.861	777.96
	116 ROV-17R	Pyrite II	53.728	46.202	0.021	0.123			0.047	0.051			0.005	100.177	8.53	272.1	200.22	2.86	2260.08	103.76	0.403	1.57	41.54	70.43	39.42	8.98	0.5	0.033	0.213	0.731	40	0.203	0.347	6.29	103.06	6.37
	116 ROV-13	Pyrite III	52.762	46.481	0.114	0.021	0.015		0.044			0.023		99.46	0.492	22.54	1646.84	6.63	2953.57	23.94	0.288	1.62	328.79	1224.39	11.26	1.07	0.156	0.064	0.79	0.873	56.11	0.1	0.266	1.46	28.33	33.23
	116 ROV-13	Pyrite III	52.47	45.766	0.087	0.001	0.04	0.005	0.037	0.087	0.051	0.045	0.025	98.614	0.839	18.05	308.23	4.1	6026.58	52.46	3.39	2.58	47.69	308.99	1.46	0.407	0.27	0.857	1.18	0.605	22.33		0.137	0.042	8.72	8.26
	116 ROV-13	Pyrite III	52.507	46.234	0.015		0.177		0.043			0.104		99.08	2.21	108.31	229.86	2.79	376.03	1643.01	2.27	3.94	1283.09	276.18	22.27	6.79	8.1	0.397		8.39	22.11	0.269	3.07	3.79	755.54	7.66
	116 ROV-13	Pyrite III	51.836	45.96	0.15	0.008	0.186		0.05		0.006			98.196	1.24	512.92	273	2.95	539.72	60.53		1.24	1744.43	1034.17	13.15	0.676	0.245			5.76	22.4	0.03	1.11	31.01	43.31	2.24
	116 ROV-13	Pyrite III	52.658	46.08	0.149		0.346	0.056	0.042			0.041		99.372	1.06	34.98	221.81	14.26	486.26	1291.77	1.59	6.61	614	69.53	14.8	1.97	2.92	0.063		26.27	43.76	0.395	2.3	25.64	252.04	16.36
	116 ROV-17R	Pyrite III	52.289	46.63	0.084	0.014	0.011		0.029	0.049				99.106	11.85	130	0.35		1794.84	154.63	0.495	2.74	9.77	8.93	28.8	4.54		0.074	0.201	0.676	0.36	1.16	0.374	21.71	8.49
	117 ROV-17R	Pyrite III	52.446	46.334			0.067		0.06	0.032				98.939	33.46	691.77	72.18	4.98	550.16	135.15		1.66	26.07	75.1	118.12	9.22	0.83			1.01	8.76	0.85	0.355	20.2	34.87	2
	118 ROV-17R	Pyrite III	52.436	46.28	0.021		0.049		0.065	0.053				98.904	17.9	627.17	173.87	6.11	664.67	542.53	0.261	1.96	38.1	231.98	95.07	9.58	1.08	0.0204		1.5	14.41	0.551	0.46	21.55	54.14	3.03
	119 ROV-17R	Pyrite III	53.51	46.929					0.031					100.47	13.65	748.1	0.748	4.88	369.81	259.22	0.129	2.55	22.1		89.04	4.61	1.36	0.0133	0.117	2.47	0.35	0.72	0.194	44.81	43.52
	120 ROV-17R	Pyrite III	53.472	46.371	0.01	0.013			0.045	0.044				99.955	19.02	786.28	0.325	1.69	220.17	166.85	0.033	2.21	24.33	2.05	71.4	2.43	1.08			1.3		0.96	0.245	44.22	28.13
	121 ROV-17R	Pyrite III	52.378	46.425	0.041	0.018			0.035				0.005	98.902	10.47	1626.47	128.26	8.46	2103.83	3202.11	1.51	9.97	152.32	74.09	180.04	9.88	5.06	0.096	0.437	3.66	25.94	0.32	0.333	29.4	148.75	4.26
	122 ROV-17R	Pyrite III	52.179	46.734			0.014		0.039					98.966	12.03	2308.32	0.196	1.42	192.38	314.94	0.101	2.62	59.28	25.6	79.49	6.78	0.63	0.019	0.105	2.66	0.62	0.484	0.51	22.9	75.57	0.048
	123 ROV-17R	Pyrite III	53.222	46.025	0.223	0.018	0.009		0.054	0.071			0.057	99.679	11.82	1770.27	2.37	12.34	1124.76	2214.01	0.558	5.17	76.2	121.38	206.74	16.85	3.54	0.048		3.44	4.98	0.267	2.15	159.02	231.45
	124 ROV-17R	Pyrite III	53.326	46.649	0.006	0.11	0.025		0.042					100.158	2.75	57.48	0.187		7.38	84.63		1.47	13.56		14.34	0.585	0.62		0.107	0.398		0.145	0.403	65.39	902.71
	125 ROV-17R	Pyrite III	52.866	46.08		0.024			0.04	0.061				99.071	2.95	92.16	0.441	1.19	12.6	38.79		0.9	14.36	0.94	41.59	0.99	0.52		0.164	0.596		0.35	0.254	63.39	289.38
Maka HF	116 ROV-13	Chalcopyrite	34.509	29.901	34.599			0.033	0.032				0.024	99.098	0.136	12.28	9.82			52.28	11.59	11.83		626.96	2.23	5.72		4.43	18.68	0.121	2.46		0.087		0.83	1.76
	116 ROV-13	Chalcopyrite	34.73	30.031	34.63				0.058			0.148		99.597	0.151	10.12	0.111			27.73	9.74	4.87		48.97		5.54	0.32	8.95	10.4
	116 ROV-13	Chalcopyrite	34.976	30.017	34.805		0.001		0.036					99.835	0.534	10.09	0.163			16.49	115.53	30.25		39.14	0.26	4.97		26.79	26.66				0.014			0.049
	116 ROV-13	Chalcopyrite	34.442	29.991	34.449		0.005		0.034		0.007	0.031		98.959		11.82	0.163			9.03	4.11	2.21		459.22		1.17		5.45	9.54		0.9					0.163
	116 ROV-17R	Chalcopyrite	34.397	30.192	34.151	0.006			0.044					98.79	1.1	10.09				24.63	15.15	8.68		227.03	4.72	4.55		10.18	25.52	0.68	2.16	0.082				0.213
	116 ROV-17R	Chalcopyrite	34.482	30.301	34.198	0.026	0.045		0.033				0.026	99.111	0.66	11.28	4.08			140.09	45.08	8.23		1449.69	4.34	36.49	0.4	7.83	26.95	0.119	5.21	0.12		0.109	0.54	0.141
Maka HF	116 ROV-17	Sphalerite I	33.459	2.052	0.346	63.111	0.021		0.43	0.03	0.07	0.039	0.277	99.835
	116 ROV-17R	Sphalerite I	33.23	2.369		61.759			0.049				0.117	97.524		18.84	7.01	2.93	214.95		13.98	334.98	1113.82		0.17	12.01	139.33	0.28	0.23	2.75			6.15	9.86	4023.3
	116 ROV-17R	Sphalerite I	32.567	1.292		62.922	0.218		0.082				0.691	97.772	0.236	24.4	0.521	0.26	486.86		59.88	814.28	9761.84		64.92	44.14	807.59	0.78	0.68	18.93			8.58	92	21512.8	0.0053
	116 ROV-17R	Sphalerite I	32.75	1.231		63.596			0.456				0.043	98.076	0.158	17.91	0.346		771.93		141.32	304.59	632.59		0.71	197.2	1284.7	0.633	0.223	64.11		0.031	3.74	3.55	1667.24	0.0137
	116 ROV-17R	Sphalerite I	32.65	0.52		65.427			0.312					98.909	0.115	24.68	1.21		937.36		55.87	595.37	6033.05		1.83	35.38	650.79	0.431	0.132	8.25	0.21		11.7	39.54	22718.1	0.0102
	116 ROV-17R	Sphalerite I	33.324	1.232	0.064	63.385	0.006		0.181				0.034	98.226
	116 ROV-17R	Sphalerite I	33.23	2.369		61.759			0.049				0.117	97.524
	116 ROV-17R	Sphalerite I	32.567	1.292	0.014	62.922	0.218		0.082				0.691	97.786
	116 ROV-17R	Sphalerite I	32.75	1.231	0.292	63.596			0.456				0.043	98.368
	116 ROV-17R	Sphalerite I	32.65	0.52	0.128	65.427			0.312					99.037
	116 ROV-17R	Sphalerite II	33.391	11.173		52.837			0.404	0.019				97.824	0.13	138.87	0.03	0.49	1645.57		18.73	326.72	32.6	1.61	1.77	166.16	761.56	2.98	0.63	418.64	0.22		5.76	2.38	1271.84
	116 ROV-17R	Sphalerite II	33.418	10.622		53.879			0.14	0.052			0.088	98.199	0.072	150.88			1674.66		27.41	341.68	3.55	2.71		236.86	1262.44	0.108	0.249	956.45			7.79	0.1	1842.97
	116 ROV-17R	Sphalerite II	33.921	14.099		50.062	0.029		0.399	0.049				98.559	0.111	142.15	0.062		2465.91		1807.46	203.28	2.26	4.47		107.96	5528.52	20.99	14.69	721.11			0.933	0.0126	115.48	0.0099
	116 ROV-17R	Sphalerite II	33.403	12.328		52.338	0.01		0.374				0.027	98.48	0.195	132.21			2957.96		1518.61	343.75	1.35	4.42	0.93	87.23	3730.6	220.33	51.11	378.61			3.53	0.059	481.2
	116 ROV-17R	Sphalerite II	33.375	10.894		53.693			0.113	0.023				98.098	0.322	135.14	0.081		4541.36		11.22	485.77	8.76		13.66	168.94	565.56	3.07	1.02	249.08	0.52	0.093	5.44	0.179	983.9
	116ROV-17R	Sphalerite II	33.391	11.173	0.099	52.837			0.404	0.019				97.923
	116ROV-17R	Sphalerite II	33.418	10.622	0.218	53.879			0.14	0.052			0.088	98.417
	116ROV-17R	Sphalerite II	33.921	14.099	0.318	50.062	0.029		0.399	0.049				98.877
	116ROV-17R	Sphalerite II	33.403	12.328	0.252	52.338	0.01		0.374				0.027	98.732
	116ROV-17R	Sphalerite II	33.375	10.894	0.265	53.693			0.113	0.023				98.363
Maka South	122 ROV-24	Pyrite I	52.625	46.893		0.052	0.072	0.021	0.052				0.379	100.094	0.63	64.17		1.97	22.06	500.66	0.131	0.66	308.66		45.92	0.14	1.22	0.0217		0.533		0.428	0.013	118.65	2751.75
	122 ROV-24	Pyrite I	51.817	46.974		0.007	0.041		0.016		0.013		0.064	98.932	1.31	54.2	0.02	1.92	33.7	2515.02	1.24	1.6	389.53		32.03	0.804	8.48	0.093	0.072	0.222		0.706	0.04	253.26	1092.51
	122 ROV-24	Pyrite I	53.035	47.138	0.009	0.027	0.048	0.003	0.051		0.008	0.118		100.437	1.7	25.33		0.56	16.87	1.8		1.07	111.29		10.1	0.9	0.23	0.068		0.43		0.051		2.25	403.64
	122 ROV-24	Pyrite I	51.661	45.582	0.83	0.08	0.039	0.019	0.059					98.27	5.05	328.41	0.046	7.91	2845.75	9247	7.93	7.49	225.99	1.73	100.1	76.38	20.02	1.08		5.32		0.112	0.684	60.43	672.86
	122 ROV-24	Pyrite I	51.127	45.712	0.6	0.214	0.094		0.042			0.009	0.534	98.332	2.57	281.29	0.04	9.31	10948.5	5217.98	66.77	6.82	1708.22	1.69	64.14	93.81	100.79	9.68		11	0.132	0.232	1.48	48.48	5333.67
	122 ROV-24	Pyrite I	53.223	46.633	0.515	0.062	0.211	0.004	0.057	0.01		0.082	0.442	101.239	5.66	66.04		2.43	62488.4	442	228.27	62.11	2986.8		32.11	70.82	8.49	55.72	0.25	108.2		0.161	1.81	15.75	3433.37
	122 ROV-18R	Pyrite II	53.109	45.903	1.227	0.001	0.013		0.041		0.037	0.018	0.003	100.352	23.23	33.16	0.049	0.48	6906.36	84.11	0.75	3.17	244.74		0.83	1.62		0.121	2.47	2.59		0.04	0.976	0.064	11.17	0.018
	122 ROV-22	Pyrite II	53.179	46.384	0.029	0.027	0.03		0.046					99.695	0.551	19.43	28.94		7082.02	233.04	17.6	1.01	678.37	100.42	11.7	0.337	3.09	0.798	0.134	0.857			0.282		1.59	0.053
	123 ROV-22	Pyrite II	53.358	46.626	0.184		0.077		0.031	0.035				100.311	0.94	18.96	0.065		1778.21	310.12	3.08	1.05	781.09	12.69	12.96	2.27	1.06	0.688	0.084	2.21			0.624		4.63
	124 ROV-22	Pyrite II	53.359	46.508	0.063	0.015	0.027		0.023				0.046	100.041	1.19	18.63	29.06		1206.44	19.81	0.789	0.64	1059.35	44.27	11.71	0.856	0.137	0.254		1.17	0.13		0.453	0.0047	1.64	0.0478
	125 ROV-22	Pyrite II	53.488	46.661	0.013	0.025	0.001		0.044				0.036	100.268	1.75	24.93	100.78		522.13		0.033	1.52	598.21	57.65	14.42	0.378		0.0152		0.75	0.91	0.016	0.304	0.063	19.13	0.026
	122 ROV-18R	Pyrite III	53.737	47.344	0.259				0.043		0.005	0.037		101.425	5.58	52.6		0.45	15789.9	23.42	2.38	3.37	1539.28	4.09	10.01	1.36		0.376	2.04	33.55	5.2	0.086	8.57	0.27	497.59	0.273
	123 ROV-18R	Pyrite III	53.648	46.371	1.251		0.098	0.004	0.034			0.041		101.447	7.49	58.76	0.134	0.79	23702.6	105.7	3.53	5.88	4155.12	3.13	2.91	7.76		0.459	2.74	7.85	4.65	0.14	23	0.501	90.63	0.251
	124 ROV-18R	Pyrite III	52.918	47.079	0.953		0.036		0.038	0.011	0.004	0.018		101.057	13.48	17.36	0.24		41719.2	304.82	5.34	10.27	480.4	109.92	4.98	10.12	0.41	3.62	38.23	30.77	2.04		1.61	0.385	81.36	2.45
	125 ROV-18R	Pyrite III	53.792	45.27	1.77		0.008		0.051		0.005	0.073		100.969	3.91	18.8			10360.6	2.36	0.27	1.21	640	1.59	0.24	0.332		0.095	3.6	1.97	0.4	0.087	0.211	0.042	5.05
	126 ROV-18R	Pyrite III	52.743	46.551	1.179	0.015	0.087	0.019	0.061	0.019	0.008	0.037		100.719	7.82	22.24			7483.97	2.26	0.072	0.99	375.26		1.1	2.08	0.173	0.05		25.5	0.87		1.4	0.104	460.33	0.0078
	127 ROV-18R	Pyrite III	53.022	46.991	0.534		0.027		0.027	0.002	0.004	0.032		100.639	6.67	17.64			4214.48		0.024	0.47	541.57			0.143				1.14			0.171		0.602	0.0148
	128 ROV-18R	Pyrite III	52.549	46.523	0.248		0.097		0.041	0.05				99.508	4.92	16.76			6866.26	3.92	0.08	0.99	1186.08		0.03	0.451				3.35		0.027	1.71	0.027	3.43	0.0181
	129 ROV-18R	Pyrite III	52.6	46.699	0.462	0.024	0.048	0.01	0.059	0.011	0.009	0.105		100.027	4.76	18.42			8070.3	3.99	1.39	1.17	1574.29	3.25	0.61	1.74		0.073	1.24	11.49	4.95	0.029	3.02	0.05	16.94	0.09
	130 ROV-18R	Pyrite III	52.595	46.302	0.367	0.002	0.089		0.031	0.188			0.332	99.906	7.35	34.63	0.018		4931.07	51.1	0.473	1.56	626.28		225.63	97.92	3.99	0.948		1693.68	0.27		13.8	0.931	3161.11	0.011
	131 ROV-18R	Pyrite III	52.806	46.386	0.868		0.13	0.007	0.038		0.004			100.239	13.42	27.98			9364.39	26.14	7.42	11.27	895.14	1.77	98.21	50.15	2.54	0.99	0.389	976.99	1.51	0.041	3.95	0.699	3747.88	0.026
	132 ROV-18R	Pyrite III	51.871	46.578	0.368		0.282	0.019	0.055			0.041	0.008	99.222	1.87	15.98			10395.7		0.078	1.09	2692.9		10.38	16.95		0.041		62.14	0.3	0.058	7.69	0.051	107.19	0.0161
	133 ROV-18R	Pyrite III	52.235	46.398	1.012		0.068		0.036		0.015	0.009		99.773	6.68	17.44			44556.1		131.85	24.08	2603.1	6.94	0.28	5.42		7.54	9	29.41		0.116	5.79	0.0301	25.6	0.085
	122 ROV-22	Pyrite III	53.359	45.795	0.11	0.048	0.014		0.043					99.369	5.77	202.48	2.69	1.83	625.75	426.02	0.519	1.71	180.13	11.34	15.92	1.99	0.93	0.087		4.25	0.95	0.452	0.675	19.57	260.71	0.066
	122 ROV-22	Pyrite III	53.258	46.161	0.012	0.041			0.061					99.533	4.93	224.04	12.76	1.55	408.4	498.04	1.33	2.95	527.72	22.94	35.39	1.16	1.2	0.11	0.142	3.01	0.76	0.462	0.763	30.35	191.7	0.315
	122 ROV-22	Pyrite III	53.412	46.833	0.002	0.03			0.022	0.059				100.358	4.67	271.66	27	1.49	460.17	5398	7.36	6.84	760.5	68.45	45.77	2.19	20.05	2.27	0.151	5.68	1.21	0.218	0.75	13.5	295.8	0.182
	122 ROV-22	Pyrite III	53.293	46.438	0.318	0.061	0.011		0.034	0.021			0.041	100.217	9.87	432.2	0.074	3.87	751.19	737.86	0.88	1.71	128.9	8.34	100.34	1.55	0.99	0.079		3.03		0.227	0.76	14.55	179
	122 ROV-22	Pyrite III	53.502	46.393	0.44	0.01	0.259		0.055				0.031	100.69	1.42	31.95	43.77	0.29	3081.89	935.77	6.46	1.79	1655.21	83.83	22.49	1.34	5.93	0.526	0.203	4.19	0.7	0.028	1.39	0.312	21.44	0.101
	122 ROV-22	Pyrite III	53.575	46.746	0.109	0.046	0.03		0.026	0.038				100.57	6.37	343.34	4.02	6.2	859.97	5552.14	6.66	13.16	397.43	15.63	155.67	3.35	11.48	1.88	0.142	7.74		0.218	1.38	30.24	479.6	0.176
	122 ROV-22	Pyrite III	53.103	46.252	0.035	0.62	0.042		0.051	0.006				100.109	7.88	748.6	7.09	3.08	948.09	1165.93	0.94	3.98	152.42	31.88	53.21	2.22	2.51	0.172		3.47	0.3	0.43	1.18	16.02	318.21	0.056
	122 ROV-22	Pyrite III	53.055	46.305	0.15	0.098	0.098		0.044	0.001				99.751	2.92	182.76	71.17	0.64	841.55	4986.21	17.78	6.34	192.03	57.53	31	2.09	16.47	1.7	0.122	2.77	4.19	0.441	0.517	11.23	190.07	0.845
	122 ROV-22	Pyrite III	53.103	46.803	0.064	0.14	0.023		0.05				0.039	100.222	6.48	144.96	12.11	3.47	387.78	1149.82	1.48	4.36	89.23	38.21	101.68	1.92	1.25	0.067		2.99		0.39	0.807	23.5	164.93	0.134
	122 ROV-24	Pyrite III	52.586	46.523	1.113		0.153	0.016	0.046		0.005			100.442	1.24	23.93		0.44	7057.33	12.81	1.07	0.82	1675.5	1.1	2.6	74.28	1.1	2.67		73.57		0.16	0.687	4.63	558.99
Maka South	112 ROV-18R	Chalcopyrite	34.49	30.137	34.645			0.01	0.045					99.327	168.63	10.18				30.95	74.22	109.13	24.12	16.65	3.13	2.4		11.17	5.67	15.05	0.64	0.1		0.115	1.02	0.103
	122 ROV-22	Chalcopyrite	34.75	30.264	32.969		0.004		0.036					98.023	0.17	12.33	0.072			12	12.82	5.55		19.39	0.39	11.65		6.59	25.34	0.2		0.027			0.045
	122 ROV-22	Chalcopyrite	34.665	29.846	33.808		0.058		0.041					98.418	0.168	11.13	0.098			26.36	29.86	5.4	13.16	15.71	1.29	13.25	0.44	12.7	14.14	5.09	1.94		0.402	0.078	6.21	0.16
	122 ROV-22	Chalcopyrite	34.29	29.795	33.43		0.016		0.066				0.048	97.645	0.275	12.33				14.17	8.42	15.03		31.15		9.16		3.45	12.79	0.048
	122 ROV-22	Chalcopyrite	34.426	29.97	33.502				0.052					97.95	0.14	13.12	0.094			8.32	15.12		5.25	15.31	6.12	6.58		7.26	21.86	0.48			0.111	0.117	2.81	0.106
	122 ROV-22	Chalcopyrite	34.575	30.088	33.537		0.004		0.028					98.232	0.57	11.7	0.389			16.15	20.3	18.86	4.78	76.03	1.33	6.2		5.52	17.03	1.12	0.65		0.1	0.041	2.62	0.67
	122 ROV-22	Chalcopyrite	34.697	30.174	33.586				0.02					98.477	0.238	9.8				13.44	40.11	60.99	0.7	116.34	0.45	4.71		5.72	16.29	1.13	0.27				0.094	0.036
	122 ROV-22	Chalcopyrite	34.58	30.207	33.602	0.014	0.013		0.042					98.458	0.53	11.67	0.105			13.26	23.34	27.54	2.34	62.56	1.47	5.01	0.45	7.14	14.67	4.38			0.032	0.034	1.43	0.388
	122 ROV-22	Chalcopyrite	34.732	30.128	34.352		0.024		0.048				0.028	99.312		9.88	0.03			14.66	27.32	11.74		41.37	0.19	3.89		6.66	14.95	0.068
	122 ROV-22	Chalcopyrite	34.624	30.164	33.151	0.013			0.015					97.967	1.59	43.82	13.31	0.69		23.66	14.87	14.1	77.16	34.69	11	5.16	0.31	5.38	21.1	4.07		0.25	0.939	1.14	74.66	2.79
	122 ROV-24	Chalcopyrite	34.946	30.016	34.669			0.013	0.055			0.005		99.704	3.58	9.64				1567.61	266.22	41.39	107.31		6.73	32.65	1.23	68.95	0.24	129.37	0.29	0.105	0.357	0.481	77.69
	122 ROV-24	Chalcopyrite	34.582	30.26	34.568	0.054	0.008		0.033			0.026		99.531	8.79	12.01	0.055			32634.3	927.27	131.57	622.73		10.71	77.01	367.6	215.91	0.143	414.46		0.274	1.08	0.575	562.01
	122 ROV-24	Chalcopyrite	34.2	30.375	34.617			0.007	0.047			0.036		99.282	4.73	9.95				2091.42	267.92	92.76	725.9	2.78	4.58	20.95	3.29	80.16	1.49	339.6		0.3	0.566	3.42	469.08	0.0132
Maka South	122 ROV-18	Sphalerite I	32.216	1.167	0.765	62.512	0.568		0.376				0.848	98.452
	122 ROV-18	Sphalerite I	32.864	1.075	0.532	64.47	0.246		0.464				0.299	99.95
	122 ROV-18	Sphalerite I	32.888	0.691	0.387	64.24	0.199		0.548	0.045			0.164	99.162
	122 ROV-18	Sphalerite I	32.66	0.564	0.296	65.309	0.188		0.46				0.291	99.768
	122 ROV-24	Sphalerite I	32.893	1.995	0.052	62.708	0.116	0	0.284				0.52	98.568
	122 ROV-24	Sphalerite I	32.513	0.791		64.017	0.021	0.03	0.476			0.028	0.3	98.176	0.592	22.43			6941.73		1370.65	302.51	806.63	1.45	0.067	47.95	5083.68	65.89	0.216	64.85		3.4	0.47	6.09	6034.32
	122 ROV-24	Sphalerite I	32.941	2.644	0.234	62.035	0.289	0.031	0.374				0.665	99.213
	122 ROV-24	Sphalerite I	32.513	0.791	0.681	64.017	0.021	0.03	0.476			0.028	0.3	98.857
	122 ROV-24	Sphalerite II	32.941	2.644		62.035	0.289	0.031	0.374				0.665	98.979	0.24	55.33			655.7		317.76	293.66	3108.47		21.77	103.32	2079.2	1.19		1.75	0.3	1.28	0.741	53.5	13683.5
																							85
