# Supplementary material for: Trace Element and Isotope Systematics in Vent Fluids and Sulphides From Maka Volcano, North Eastern Lau Spreading Centre: Insights Into Three-Component Fluid Mixing
Source: Frontiers journal article supplement (doi:10.3389/feart.2021.776925), 2021-12-07
Supplement: Table_9.XLSX [file Table_9.XLSX]

## Sheet: Bulk back-arc
Table A9. Compilation of published bulk sulphide-sulphate data from back-arc hydrothermal systems.
Location	References	S	Fe	Cu	Zn	Pb	Mn	Co	Ni	Ga	Ge	As	Se	Mo	Ag	Cd	In	Sn	Sb	Te	Ba	Hg	Tl	Au
		wt. %					ppm																	ppb
Okinawa Trough	1		10.5	0.3	22.5	14.8	900					13800			3500	700			7000
(Pacific Ocean)			12.5	0.56	37.5	25	1400					2900			4100	1100			2700
			0.61	2.92	10.8	7.85	200					7900			3000	400			9200
			11.5	4.41	27.4	12	1500					2400			11300	1300			1100
			10.2	5.39	33.6	4.3	2000					200			4100	2000			9000
			18.56	0.14	4.39	1.56	200					1000			300	200			4100
			35.59	0.32	10.05	3.36	400					300			100	500			300
			1.31	3.45	14.2	6.4	500					16000			100	800			1100
			4.81	0.02	3.09	10.5	2900					903100			640						86500			7800
			13.55	0.34	35.12	15.85	900					13800			6500	600					6400			9800
			11.72	0.49	39.89	19.52	1000					2500			4100	1100					500			4800
			5.63	0.04	5.46	8.32	3500					44000			760						74400			4200
			1.06	3.64	15.17	5.91	300					11200			180	800					200			300
			7.23	6.09	33.26	25.52	800					600			500	1300					300			700
	2	18.1	6.2	3.3	20.2	11.8						17500	4205		2305	820			6710	11.1	72000	190	345	3130
			10.5	3	31.4	13.5						1725			465				1136			8		1230
	3				0.26	0.23						1086			77				206			51
				1.02	6.52							789			10152				12260					4310
				1.46	12.8	5.01									91									2450
				31.5	21	6.88													616
Valu Fa Ridge	2		8.7	5.6	28.2	0.1		27	5			380			17	555	53
(Pacific Ocean)		18.1	6.8	3.2	12.1	0.4		3	22			450		36	86	300	11	8	78		218000	3	47	2680
		27.4	7.4	5.5	27.6	0.3		3	13			1900		16	120	855	125	19	76		108000	3	5	3210
		38.9	32.3	1.7	11.6	0.7		23	28			3815	35	18	405	350	1	11	21		33000	1	22	1430
Hine Hina	4	28.25	0.02	0.25	53.61	2.87	60					14500			1545	1594					96100	0.61		53
		29.8		0.24	53.4	3.14		6	20			9060		2	2150	1805					88000			10
		45.92	41.67	2.3	0.61	0.0193	50	7	25			280	40		35	21					4100
		47	43.05	0.49	0.11	0.021		20				1250	64	47	144			10	14		3600			690
		48.5	40.1	2.54	0.04	0.017		15				415	39	11	25							0.93		480
		45.93	40.89	13.22	0.02	0.0206						880	4	40	126				24		300	0.38		3800
		51.09	47.22	0.35	0	0.0618	155					6020		37	736				86		400			10000
			44.8	0.28	0.81			67				3700	60	3	150	53			28		100			670
White Church	4	15.85	3.23	0.36	6.24	0.85						550		12	174	71			155		373300			2880
		12.9	1.8	0.11	2.6	0.638		5				337		14	100	25			90		423000	1
		15.4	3.5	0.15	4.7	0.384		5				435		15	110	80			93		395000	0.51		1600
		15.77	3.67	0.25	6.32	0.615						540	4	25	149	82			112		346700	1		2900
		18.54	5.53	0.35	14.36	0.376						582		47	145	217			133		197900			3500
		18.55	6.08	0.41	12.54	0.427						588		36	149	216			120		215900	1
		17.6	5.08	0.16	8.1	0.517						552	4	30	140	95			100		331000	0.65		4000
		16.22	2.26	0.3	6.77	0.432						204		13	88	162			58		411600
		14.5	3.1	0.08	0.3	0.342						655		11	135				65		462000	1		3000
		14.29	0.81	0.12	2.16	0.26						68		2	92	58			29		491500	1		1600
		12.57	0.49	0.11	0.88	0.508						244	1	3	128	12			58		448500			2300
		14.4	1.4	0.15	5.3	1.39						260	4	9	185	77			120		437000	1
		34.04	14.08	0.8	36.08	0.289						2050		60	170	1143			187		39400	1		3700
		31.73	30.58	29.14	0.93	0.0055						146	5	218	67	59			32		800
		35.7	32.2	30.6	0.36	0.0081						202	7	195	40	23	22	10	20			0.68		48
		6.89	3.7	0.16	0.67	0.136		7				115	8	6	46				82		78300			42
		8.19	7.24	0.11	0.49	0.0172		13				468	2	41		20			12		49300	1
		33.41	11.56	9.99	45.27	0.0065						177		92	26	2054					500
		33.7	6	5	54.9	0.018		6	25			103	4	214	22	1730						0.079		82
		14.4	2.1	0.39	11.4	0.28						342		23	168	242			169		279000	1		3000
		10.71	3.99	1.16	12.49	0.328						421	2	40	162	306			145		56300
Vai Lili	4	27.67	7.41	10.23	13.63	0.014						170		12	37	385	149	10	17		75100	0.026		150
		34.2	29.3	34	0.5										22	17	305	76			8000
		26.43	14.23	17.54	15.14	0.078						457		25	83	543	469	25	90		162500	0.26		1300
		23.9	0.55	1.08	34.8	0.101			25			1280		35	170	1270	70		135		273000	0.93		2900
		24.66	0.5	1.25	37.77	0.22			20			2510		22	180	1268	24		123		243500
		25.31	0.28	1.59	39.98	0.165			25			1880		10	243	2032	100		120		231000	1		4800
		27.4		0.63	45.6	0.759			28			1830			187	857					160000	1		31
		26.29	0.25	1.5	48.27	0.263			25			1920		8	173	1384			24		151000	1		310
		29.2		0.67	47.61	0.622			25			2100			212	1145			17		148000	1		400
		29.4	0.04	1.16	53.93	0.0025			25			2960		4	294	1556					130500			2900
		29.17	0.03	0.58	55.92				25			3320		1	391	1088					102500			12
		30		0.48	54.36				25			3280			420	1100					97000	1
		32.8	22.2	1.32	11.46	0.0011						1270		102	58	110					35800	1		380
		37.1	29.8	27.2	3.7	0.004						737		30	35	120	170				8000	0.23		440
		35.15	30.53	29.56	1.39							640		33	35	32	183	11			9800
		24.85	14.03	4.43	10.68	0.0036		9				1670		42	59	196	42	15			105500	1		1800
		27.5	21.67	5.5	0.44			15				737	2	88	14		30				37000	0.91		330
		31.94	25.55	8.43	0.86	0.0011		8				595		69	25	28	47	10			46100
	5	38.1	33.1	0.3	0.2	0.02						2400			150				38		5.1			690
	3			4.32	17.3	3.7						4278			370				21					4030
				3.24	15.5	0.35						514			110				95					2970
				6.04	28.2	0.33						1843			127				63					3380
				0.68	23.7	0.25									128									5730
				1.82	22.5	0.38									115									3340
				12.6	2.7										52									10800
				4.2	24.6										294									8350
				0.9	59.8										673									28600
				19	2.47	27.8						81			10.2									210
				5.36	6.04										62									4650
				5.49	27.4							381			17									2420
				3.68	22.9							133			68				11					4160
				4.85	35.4	0.25						371			121				26					4430
				10	1.45	28.1						162			3.78									220
				4.09	30.2	0.3						929			65				90					2130
		7.6	0.3	5								129			2.82
		1.7		1								509			12.9
		0.43	3	6				239				7.53			1.13
		1.18	9	5				546				16.1			2.11
		18.6	1.39	22		0.0113		844				94			4.88
		19	10.8	13		0.0094		1021				146			2.36
	6	36.3811	46.8	0.305	2.26	0.0141	220					260			8	110			31		56000			200
		35.9444	48.4	0.0795	1.37	0.0128	330	2				190			8	20			24		53000			180
		23.14	0.41	0.903	45.9	0.202	2700					1600		24	83	1200			17		150000			320
		26.72	0.36	1.33	53.1	0.0461	2200					2300		20	110	1900			51		63000			1600
		38.5336	50	1.24	2.73	0.0022	18					310		5	6	130			44		11000			210
		42.3172	51.5	0.512	1.03	0.0031	32					250		11	4	28			8		2100			270
Tu'i Malila	6	29.2367	17.9	10.3	17.7	0.0277	560					880		97	40.2	1000			90.3		49000			1400
		32.129	8.65	1.51	45.2	0.178	800	14				530		140	48.8	1900			52.9		1370			2600
		13.3803	9	0.18	6.17	0.137	710					1400		49	110	76.2			110		360000			7000
		33.7474	16.4	8.33	30.4	0.0502	600	29				380		46	42.1	1400			15.7					780
		40.7	29.5	7.04	1.33	0.0133	35	36.1				160	530	15		59			5.8		3930			110
		16.5276	2.24	0.977	28.4	0.166	140					1900		130	150	1400			220		260000			7800
		16.8258	8.56	1.05	12.4	5.92	850					800		26	130	240			120		228000			2700
		8.65616	4.83	0.112	6.32	0.0711	440					860		18	95.2	67.5			87		420000			5100
		9.02056	5.2	0.139	6.19	0.0929	470					870		19	100	70.9			96		420000			5600
		17.9	1.6	0.237	7.17	0.475	180					400		15	62	190			87		380000			4400
		19.028	6.23	0.696	24.2	0.0351	300					900	4	75	63.6	1200			140		250000			8500
		12.2607	4.65	0.499	14.1	0.0396	340					720		34	98	720			110		350000			7500
		21.8261	8.02	1.16	25.6	0.399	610	4				660		80	96.1	1500			110		110000			5000
		22.0618	9.78	0.358	21.5	1.86	840					1300		89	190	560			270		200000			11200
		2.42243	1.27	0.0707	1.85	0.368	95					270		8	68.9	65.1			41.8		470000			2800
		31.0384	6.56	0.426	47.8	0.395	810					900		24	110	1500			250		6750			6300
		9.34423	5.58	0.105	5.95	0.126	670					810		15	92	98.7			91		400000			4700
		16.6	0.52	0.356	13.5	0.296	730					970	4.2	6	160	260			58.5		302000			4300
		26.5	3.7	1.08	32.7	0.342	320					1300	19.4	28	170	1600			450		171000			5100
		24.1	4.23	0.337	21.6	0.421	410					1100	11.4	35	220	840			190		260000			9100
		24.2	4.18	0.447	22.8	0.591	480					1200	10.2	36	250	640			170		257000			9400
		2.1176	1.59	0.1	0.585	0.0337	110					530		5	160	9.5			79.2		494000			4100
		9.18516	4.99	0.119	7.04	0.0203	290					550		19	52.1	240			47.6		400000			3700
		13.2	0.12	0.0656	1.86	0.347	940					350		1	57	14			23.1		413000			2300
Mariner	6	24.9833	19.9	28.7	1.24	0.0001	140	3				380		130	24.1	47			45.5		55000			4700
		24.1187	19.4	29.1	0.144	0.0007	130					17.6		9	9.4	4.6			4.1		7790			900
		33.1	26.3	23.9	4.62	0.0592	25					560		27		87			34.1		26600			1800
		31.5	24.2	19.6	4.91	0.0552	27					520		27	28	100			37.8		28600			1800
		28.2	19.7	19.4	0.08	0.00212	160					52.7		9					10.9		5500			460
		34.4	29	23.8	2.79	0.0501	13	1				530	11	31		44			23.2		30100			690
		26.4	9.03	6.73	0.484	0.00531	38	1.1				70.5	3.2	22		12			7.4		6220			390
		30.9969	20.2	10.5	25.7	0.0772	99					1200		30	71	760			110		65000			3000
		28.2	14.1	20.6	14.7	0.134	27					1900		6	120	270			200		101000			3300
		25.1	5.08	10.5	22.4	0.205	40					1800	6.2	56	220	550			200		132000			9500
		22.4168	13.8	5.33	13.4	0.0041	980					1600		43	170	590			430		186000			4600
		30.6294	27.1	30.6	3.5	0.024	22					530		15	19	110			79.1		53000			1300
		27.5195	21.1	18.8	6.71	0.0252	52	3				700		21	38.8	170			86.8		130000			1800
		22.2557	14.5	4.89	11.4	0.109	12000					2100		48	77.9	350			190		210000			2900
		26.5	3.41	0.565	34.8	0.319	38					1700	14.3	7	98	750			170		176000			3600
		22.6	15.1	39.3	0.133	0.00511	83					510		70	96				38.7		11200			12100
		15.1	0.5	0.0551	3.63	0.329	91					840			41	14			20.4		429000			3500
		15	0.86	0.0771	2.62	0.422	2500					980		8	110	15			67.8		432000			4100
		28.5	2.79	0.0998	45.4	0.274	120					1100	19.3	3	260	860			190		111000			4700
		26.6	2.46	0.0296	38.5	0.28	98					870	13.7	1	160	430			89.1		184000			2600
		17.83	0.15	0.673	35.7	0.003	40					2000		17	640	1500			12.1		226000
		20.26	0.15	0.403	40.8	0.0707	26					950		15	360	1600					240000
		18.06	0.15	0.229	36.4	0.093	20					750		15	250	1000					260000
		25	2.53	0.569	34	0.267	81					1300	13.6	4	180	770			180		195000			5100
Eastern Lau Spreading Centre	6	34.3116	29.8	22	0.201	0.0022	80	31				6	770	9	21	9.1								200
(Pacific Ocean)		44.5822	40.7	15.5	0.21	0.0002	25	63				2.9	330	68	19.3	9.4								180
Kilo Moana		33.6595	20.9	12.3	19.7	0.0121	42	57				120	280	99	59.3	750			16.4					2700
		24.5743	19.1	1.95	5.39	0.0147	42	100				210	110	53	47.9	180			3					1000
		47.4116	47.5	1.21	1.21	0.0302	150	410				85.6	210	37	13.2	37.4					320			1500
		12.8169	11	2.46	0.383	0.0016	52	270				6.3	300	27	11.7	25.5								350
		43.4	33.7	0.44	15.6	0.178	880					370	130	200	84	610			8.6					7100
		38.7415	23.4	0.35	38.5	0.0828	180	4				160		36	110				15					7000
		41.0701	35.7	0.0846	23	0.173	230	2				190		61	160	420			13					9200
		36.674	23.5	0.363	40.7	0.0965	180					180		42	97	1900			21.9					7200
		34.6669	20.1	0.391	46.5	0.0506	130					90.9		48	62.6				16.3					4400
		34.8961	19.5	0.386	45.1	0.0431	130					87.2	22	50	61.6				15.3					4600
		34.273	12	0.496	55.3	0.0707	130					110	15	31	73.6				28.2					3800
		46.7438	47.1	0.0124	3.76	0.0642	230					96.5		42	24.2	27.1								1100
		36.2815	24.4	0.318	37.7	0.252	1400	55				270	110	49	96	1600			18.4					10500
		41.7376	29.3	0.677	27.9	0.061	180	9				320	63	56	92.6	1100			16.8					5600
		48.3	37.1	0.152	9.72	0.229	910	7.5				420	78.7	88	100	180			9.2					8700
		29.806	17.3	0.362	20.2	0.234	560					200	30	37	140	420			15.2					7400
TowCam	6	35.3228	28	24.1	14.4	0.0102	130	3				99.2	41	46	130	1300			10.7					780
		34.648	15	2.29	35.4	0.408	1400					570	8	140	210	1400			24.5					4800
		36.4004	11.7	1.77	46.7	0.398	670					610	26	140	120				44.2					9800
		32.9118	11.4	5.93	40.4	0.0485	450					220	29	130	20.4				22.4					1300
		29.7173	6.18	0.963	46.1	0.0657	510					63.2		24	39.4				6.2					810
		22.643	8	0.647	27.4	0.121	530					170		20	100	1100			22.6					2700
		39.8473	25.3	3.91	30	0.19	1400					570		100	89.1	1800			23.1					5000
		33.5696	12.5	3.16	50.2	0.294	800	5				330	17	170	160				33.9					5000
		28.7012	12.9	0.844	28.1	0.698	1300					710	8	280	210	1300			44.4		5100			9700
		28.4	13.9	1.21	28.1	0.12	1100					400	71.1	280	240	1000			21.5		1			5800
Tahi Moana-1	6	32.4	22.2	17.9	10.8	0.014	270					44.9	43.8	30	68	630			6.1		1630			330
		31.3	7.84	1.01	45.4	0.344	810					580	20	120	230	1000			114		2590			8800
		32.9	13.7	0.655	27.4	0.214	1000					610	20.6	210	130	740			69		13300			4200
		39.2	19.6	1.11	33.1	0.272	920					810	29.4	110	190	1100			98.7		3550			5800
		29.3	9.35	2.98	21.5	0.0461	490					150	34.3	41	40	1300			56.1		700			1800
		38.4	20.2	0.308	29.6	0.262	690	26.1				710	53	90	170	1500			143		11700			5400
		34	17.9	0.422	35	0.241	720	3.9				640	40.7	67	240	1400			148		1			6700
		32.7	12.2	1.02	35.6	0.26	850					830	23	190	180	1300			62.9		1			5700
		31.3	14.6	0.825	29.5	0.259	1600					940	13.9	310	210	700			72.7		38000			5200
		30.4	5.06	1.51	50.8	0.295	250					960	29.6	150	280	1200			97.5		6450			8100
		29.4	12.6	0.779	35.6	0.643	1400					890	12.8	160	330	550			103		50100			11000
		32.7	14	0.979	37	0.488	1700					900	16.9	110	250	800			99.6		1			9000
		25.5	1.93	0.288	5.46	0.0183	230					93.3		14		170			7.1		520			580
North Fiji Basin	2	37.5	26.3	7.8	9.8	0.1		89	5			270	78	82	200	555	1		58		10000	11		2550
(Pacific Ocean)
				5.3	10.2	0.1						188			88									1190
				16.6	7.23							426			292
Mariana Trough	2	17.8	2.4	1.2	10	7.4		2				125	10	5	185	465			190	0.1	333000	22	19	780
(Pacific Ocean)
				0.92	9.13	5.93						117			169				174					720
				2.78	4.37	0.14									32									250
				0.3	5.32	0.26									164									530
				0.1	20.6							2174			125				48			18		1230
				1.04	0.88										59									1280
Izu-Bonin arc	2	1.9	4.4					3				95	1	1	11	0.4			72		77000	3	1	20
(Pacific Ocean)	3											45			43				20
												96							74
Manus Basin	7	37	4.43	27.5	0.00427	0.1221	2.46	0.27	0.16			111000	35.2	3.6	123	2.11	0.7	133	3200	46.5	49300		11.4	16700
(Pacific Ocean)		29.2	1.2	39.2	0.0047	0.00043	11.1	0.54	0.54			178000	51.6	18.8	133	0.1	0.25	62.4	19600	0.82	93200			1890
		32.1	0.94	41.5	0.0008	0.0054		0.26	0.53			185000	59.4	4.04		0.04	1.85	505	9700	602	36300			2220
		46.5	11.6	12	0.00691	0.022	3.4	0.42	3.17			36000	24.9	20.8		0.35	0.4	33.7	500	28	177000		8.56	27000
	2	24.5	11.6	1	17.6	0.6		24	19			425			514	500					87000
		24.7	12.4	6.4	24.8	1.4		7	7			4600	10	97	290	960	57	9	670	6.2	64000	11		13490
		29.7	20.8	14.2	1.1	0.2		118				7890	39	470	97	92			385	23	53000	17		14520
	3			8.37	21.2	1.34						4673			257				630			11		12600
				10.1	5.05	1.16						5024			186				1081			62		15600
				5.31	0.56	0.1						1732			23				59			4		4340
				7.2	0.4										23									5000
				8.1	0.9										34									6400
				6.16	41.1	0.33									396									19000
				9.14	30.7	3.27						8197			546							4		4720
				7	22.6	3.55						6573			424							40		13700
				7.3	36										56									3600
				5.5	7.67	1.49									263									13900
				5.28	3.82	0.25									108									6700
				7.08	1.6	0.23						43481			39				841			30		4830
				7.36	9.24	0.74						5641			191				207			18		6810
				7.95	9	1.23									282									18600
				4.53	12.3	1.8									313									21400
				3.04	15.5	1.14						544			184							4		3080
				0.3	19.6	1.21						1633			110									190
					0.15	0.42						793			181							54		40
					0.13	0.64																3		3500
				2.14	18.6							42			105							3		2820
				1.4	19.2							101			97							3		3320
				7.09	7.45	0.13									152									2310
				0.94	15.1										62									890
				0.97	18.8	0.51						508			323									6740
				1.29	22.4	1.13									488									15400
	8	36.77	32.61	25.29	0.996			194				1300		250.5	31.5	1.87	4.85		142		1930			14500
		31.38	27.51	20.4	1.205			194				2320		244.7	97.4	56.34	4.82		240		81700			2000
		26.19	22.07	19.5	1.935			68				1700		164.4	110.4	93.05	4.54		245		139000			2000
		33.93	29.21	25.78	0.5769			90				1440		174.7	91.4	35.66	4.66		255		61300			23600
		40.06	36.05	16.06	0.1372			682				2410		470.5	13.5		1.47		57		4840			3940
		11.05	9.44	5.19	0.0788			117				3180		16.2	140.2	6.69	4.84		857		425000			28400
		9.92	8.29	6.42	0.0884			112				3880		13.55	150.9	10.34	6.53		1535		420000			31200
		26.66	10.99	7.39	0.2144			27				664		41.6	18.8	11.81	0.67		80		28900			3050
		28.83	24.99	25.73	0.178			68				934		385.85	97	9.11	5.6		165		103000			58300
		14.82	10.29	5.35	6.5747			57				3190		183.5	247.1	363.6	2.07		682		300000			32500
		34.23	29.53	23.62	1.0407			238				1180		439.85	81.7	48.88	5.39		184		47500			26000
		42.79	35.45	17.94	0.0486			1306				2600		174.15	147	3.19	1.52		193		3530			18400
		38.72	32.16	14.99	0.069			974				2510		102.5	75.7	3.59	1.01		117		41900			9660
		21.93	17.23	17.1	3.495			27				3890		216	167.9	259.34	3.77		525		195000			12700
		16.52	11.93	7.12	4.8391			78				3690		211.35	289.6	317.55	2.44		793		282000			28800
		31.02	26.76	25.3	0.1933			42				1260		54	40.5	11.37	4.27		82		50300			4670
		27.88	23.94	22.66	0.3224			45				890		72.3	73.2	24.04	4.71		109		93200			9570
		24.21	19.52	11.17	2.8951			84				3110		375.4	166.6	171.03	3.08		538		178000			23800
		21.15	18.02	12.26	0.4623			241				675		256.5	40.1	24.83	4.39		145		274000			23700
		24.17	20.64	18.93	0.1063			138				303		338.6	32.3	2.35	6.31		147		203000			36800
		35.03	29.21	24.01	1.1999			119				2800		643.8	172	74.6	5.25		432		340			31200
		22.08	3.55	3.31	41.488			14				3810		89.35	153.1	1912.11	4.5		2899		135000			12900
		11.95	6.13	2.35	8.9663			4				11100		53.65	361.6	597.91	1.83		1859		340000			22300
		16.42	13.73	13.9	0.4595			519				4240		37.8	182.6	43.49	11.28		974		310000			59500
		27.97	23.74	25.14	0.0437			449				3400		47.8	179	2.98	15.09		1155		142000			75400
		3.25	2.6	1.35	0.7616			457				5270		7.3	198.9	62.48	7.35		1123		537000			12000
		3.37	1.17	1.54	3.129			308				6330		4	197.5	184.63	6.71		853		532000			7710
		23.88	19.83	21.06	0.0377			361				3160		25	255.5	2.52	12.52		1011		168000			68900
		47.58	40.03	0.12	1.4527			188				2600		61.3	34.2	39.38	0.11		50		55100			2140
		41.89	28.31	0.41	0.009			17				155		2.1	5.2		0.03		17		30700			800
		43.87	25.89	13.56	0.0064							40800		1.3	29.2		0.05		414		67700			7330
	9		23.2	6.4	6.8	0.22									41						28000			5000
			4.1	1.5	23.3	1.24									286						226000			7400
			22.1	8.8	12.4	0.54									106						30000			8100
			11.3	7.4	23.9	0.5									210						147000			31200
			10.4	7.7	25.2	0.17									200						129000			19600
			20.3	3.3	10.3	0.35									130						29000			8600
			27.4	7.5	6.5	0.25									58						19000			4000
			9	2.3	25	0.85									163						10600			11400
			11.9	12.9	12.2	0.13									135						21000			57100
			3.3	0.7	46.6	1.22									584						78000			35800
			3.5	0.4	44.7	0.99									403						82000			30400
			25.3	7.2	1.1	0.06									6						9000			1300
			29.4	4.4	0.2	0.02																		1900
Bransfield Strait	3			4.1	18.5	2.1						7586			301				573			57		540
(Atlantic Ocean)												340			262				481			39		430
Kulo Lasi	10	32.56	9.9	1.04	47.7	1.4892		754	157	45	160	780	33	62	298	2482	47	694	77		50400
(Pacific Ocean)		32.01	11.1	0.29	43.47	1.7042		1311	128	734	324	1724		37	232	1829	30	652	215		29100
		33.12	35.5	0.77	13.2	0.3949		1075	26	157	59	532	207	32	68	635	12	311	93		8100
		33.85	36.95	0.83	11.84	0.2495		749	22	145	38	551	132	36	62	576	11	348	120
		37.09	46.94	2.02	8.67	0.2902		2254	25	15	14	920	501	63	43	455	26	156	37		17500
		39.92	39.5	1.53	7.56	0.2121		2471	82	107	26	1161	489	22	26	367	13	240	86		2800
		40.17	58.76	1.7	2.78	0.0392		2649		49		558	812	56		151	18	106	22
		39.35	55.07	1.88	2.63	0.0501		2664	22	20		1525	483	154		178	10	68	34
		33.32	44.72	1.01	1.5	0.0767		1703	35			126	867	65		84	48	42			38800			900
		46.49	42.32	1.27	1.11	0.064		1077	77			267	370			60	18				7300			700
Tinakula	11	33.3	25.65	30	1.99	0.0044	10	2		23	9	54	9	343	42	144	262	14	9.3		500	535		4692
(Pacific Ocean)		35.4	27.97	17.03	1.54	0.0428	205			21	24	568	8	85	42	61	59	6.3	55		6500	11080		1014
		34.4	21.78	10.14	1.54	0.1401	41			682	72	1091	54	53	66	15.12	57	19	158		11000	30122		2670
		27.6	12.05	10.52	21.5	0.1927	189			91	74	579	11	66	138	963	125	5	193		40600	10697		3517
		23	2.88	0.68	30.92	0.4441	36			31	69	641	13	14	139	1008	14	9	143		94900	19145		1133
		19.8	2.1	0.81	27.1	0.53	227		10	65	51	425	12	110	124	1120	27	4	179		91500	6480		4270
		21.9	6.6	0.38	15.61	0.66	311		20	18	30	567	11	46	272	601	5	1	364		134900	19050		5455
		30.1	14.8	1.52	25.02	0.2444	2338	2		26	50	625	13	67	112	761	5		299		23300	35100		3510
		35.8	22.8	0.51	3.39	1.26	578	1		13	21	488	7	11	210	155			119		85800	27300		3905
		5.1	2.35	0.02	0.23	0.1545	63	2		4	2	112	1	9	32	3			46		151800	35880		171
		10.2	1.39	0.05	3.39	0.389	272	6		9	22	221	5	10	56	20	2		47		154000	25200	1100	221
		17.4	5.09	0.77	16.74	0.6918	58	2		20	79	830	10	29	110	562	9		243		60200	23103	500	2397
		13.7	11.7	5.4	2.09	0.0097	12	7		33	11	441	8	17		77	48	1	19		900	1770	3300	1220
		24.9	18.95	10.18	2.45	0.0079	36	11		19	19	255	10	163		109	44	1	13		7100	905	1000	255
		22.2	0.91	0.86	35.6	0.0539	11			3	66	659	12	22	401	1610		3	530		94200	13700		356
		31.7	22.2	7.86	5.16	0.0217	192	2		24	32	306	12	143		263	30	11	14		9700	1070		552
Nifonea	12	44	34.2	2.65	9.19	0.151	372	33	7.4	24.4	4.4	8480	1110	45	19	194	25	13	84.9	4	8		41.3	105
(Pacific Ocean)		33.2	17.4	2.11	3.24	0.042	267	25.3	9.8	9.9	1.8	2970	462	27	11.3	76.2	13.3	6	29.4	2.4	18	6240	14.4	63
		24.8	4.66	0.139	0.088	0.008	86	9.2	8.9	0.1	0.4	745	124	9	2.9	1.9	0.4		5.3	1.1	18	2400	4.84	12
		43.2	31.5	2.36	12.5	0.052	401	36.6	3.4	35.1	3.2	4810	835	19	13.7	314	47.3	17	36	3.2	12	5280	22.4	70
		43.1	31.3	0.748	11.2	0.078	448	8.3	3.6	27.7	2.4	9000	649	26	13.3	244	23.5	12	66.2	1.2	12	9960	58.8	98
		34.2	18.1	0.497	2.6	0.044	279	13.7	6.4	7.5	1.4	5950	327	16	8.75	55.7	7.5	4	38.3	1	23	6810	35.1	50
		32.6	17	1.31	4.64	0.066	248	24.8	5.4	12.3	1	2250	220	21	10.4	104	14.3	8	32.3	2.4	15	3870	27.3
		29.2	12.8	0.986	1.54	0.02	129	27.9	5.2	5.1	0.8	1200	186	14	6.5	43.3	7.2	3	13.2	1.5	18	980	10.9
		22.8	3.42	0.201	1.32	0.005	44	9.6	3.1	4.1	0.4	295	76.8	4	3.14	37.3	3.8	2	4.3	0.8	25	300	1.33
		25.3	7.24	0.025	0.102	0.008	118	15.9	4		0.4	542	88	7	1.64	2.4	0.3		2.2	1.1	19	380	4.65
		30.9	15.2	0.495	3.33	0.024	229	5.5	3.4	9.4	0.8	1290	193	15	4.72	86.6	10.3	4	18.1	0.7	18	1990	15.1
		30.5	13.7	0.257	0.208	0.027	84	55.1	10.6	0.5	0.8	1020	196	10	3.16	7.3	1.4		12.5	2	19	2330	5.86	49
		33.2	18.4	0.661	0.335	0.032	122	32.6	8.7	2.1	1.3	2280	326	19	3.82	15.1	2.9	2	14.6	2.4	17	2090	5.59	68
		44.4	35.5	0.983	1.04	0.113	188	33.4	5.6	4.2	3.5	6250	923	35	17.2	38.4	3.9	3	66.5	3.8	14		24.1	233
		25.1	12	0.766	1.99	0.015	209	32.2	28.1	10	1.6	1440	399	20	5.9	48.7	5.7	4	13.7	2.5	25	2620	5.16
		35.7	20.3	0.851	3.58	0.053	254	14.4	5.2	9.7	2.2	3570	579	21	7.82	79.9	11.3	5	29.3	1.9	21	4490	28
		34.4	18.3	1.44	8.99	0.064	240	23.9	2.9	24.4	1.4	1840	317	15	16	233	24.5	11	41.8	1.2	17	2410	24	52
		30.7	15.3	4.21	7.65	0.075	142	19.3	3.7	25.6	1.7	939	390	30	15.9	209	35.5	14	34.5	1.9	16	2410	15
		33.8	18.9	4.47	8.79	0.142	118	25	7.9	31.8	1.8	1490	315	28	32.7	281	26.4	9	62.2		14	4620	25.5	65
		36.9	25.2	1.23	12.1	0.182	206	16.2	4.1	32.6	1.7	2430	229	15	37.2	346	21.2	7	81.3		12	7200	47.6	80
		38.6	31.7	1.65	17.3	0.291	266	18.2	2.7	39.1	1.3	3790	351	22	27.8	463	22.9	9	109		26	8690	48.6	86
		23.5	3.39	0.705	0.206	0.00298	41	16.8	3.9	1.2	0.2	161	45.6	47	5.76	6.9	1.4	1	1.8	0.1	27	130	1.64
		23.3	3.57	0.026	0.062	0.003	89	14.4	5.4	0.1	0.2	173	34.9	14	2.34	1.9	0.3		1		26	110	1.64
		28.1	10.7	0.593	0.18	0.011	128	21.9	6.5	0.7	0.4	769	107	13	2.51	5	1.2		4	0.1	14	330	5.07
		32	15.7	0.383	1.82	0.031	101	9	3.6	9.1	0.4	960	78.5	12	7.35	65.1	7.1	2	14.8	0.2	10	1590	17	24
		41.8	34.7	8.84	6.2	0.057	35	80.8	9.9	28.8	2	2970	369	64	29.2	242	24.7	8	44.7	0.2	17	1250	35	127
		32.7	16	3.85	17.5	0.285	80	18.1	3.3	45.3	1.4	3370	140	42	42.6	518	26.8	9	99.7	0.1	16	6700	46.1	145
		43.6	40.5	6.67	3.14	0.042	23	47.9	6.3	11.4	1.3	3320	350	87	19.5	108	13.6	4	29		5	690	31.6	169
		37.5	24.3	3.43	13.8	0.099	113	16.7	3	47.9	0.7	2150	124	30	33.2	480	35.2	11	96	0.1	11	3960	42.2	144
		44.4	42.4	9.48	0.826	0.034	37	150	21.3	3.9	1.8	2080	444	40	5.88	21.8	8.4	3	8	0.1	31	60	25.8	88
		42.1	37.7	1.87	4.8	0.057	73	8.4	2.2	18.5	0.6	2130	111	28	17.4	178	18.5	5	34.8		17	1010	56.5	131
		35.4	22.3	0.907	18.2	0.105	122	8.6	3	59.8	1.5	1540	42	18	43.6	572	41.2	14	84.3		28	5430	66.6	162
		36.4	24.5	2.32	17.9	0.261	80	20	2.7	56.9	0.8	3570	110	21	48.6	605	33	12	103		8	4570	89.1	165
		29.8	19.8	8.14	4.51	0.024	40	15	6.1	23.4	1.8	376	389	87	27.3	173	25	6	31		36	1460	3.19	37
		39.1	26.1	1.23	3.74	0.049	128	33.5	7.3	12	1.3	2390	332	38	15.1	117	9.2	3	24.5		13	3030	28.4	45
		32	14.8	0.087	0.146	0.018	102	60.6	29	0.2	0.6	942	148	12	4.03	2.6	0.3		3.2	0.2	17	380	10.2	21
		35	18.6	0.443	0.171	0.018	124	26.2	7	0.7	0.7	1230	162	24	2.59	3.6	1		4.8		15	730	10.9	19
		37.8	25.5	1.68	0.41	0.021	140	41.9	7.7	1.4	1.3	1660	303	32	3.71	11.3	2.9	1	5.7		21	540	20.5	49
		40.2	27.4	3.43	3.58	0.051	185	24.2	6.1	16.4	1	3220	237	32	15.2	122	13.4	4	30.1		13	1900	43.1	137
		39.4	24.3	0.125	16.8	0.412	284	3.6	3.4	37.4	0.2	4200	16.6	27	30.4	422	19.3	7	108	0.1	16		122	74
		28.1	9	0.629	0.434	0.009	114	19.9	7.6	2.2	0.4	708	91.9	22	6.09	14.9	1.9	1	4.3		19	410	8.92	18
		38.4	24.1	0.819	1.03	0.026	91	27.3	3.8	4.2	1.2	1650	307	20	6.69	37.8	3.8	1	11.6		18	1760	11.2	31
		31.5	14.1	0.819	0.241	0.008	64	31.7	5.2	0.8	0.8	567	190	17	2.54	5.1	1.5		2.5		17	470	4.9	9
		34.8	16.8	0.802	18.2	0.153	70	38	2.4	59.3	1.2	2460	74.2	15	43.1	574	33.9	13	117	0.2	14	4890	34.9	184
		32.1	17.7	10.5	1.7	0.016	32	61.8	22	8.7	1.4	898	363	84	16.2	53.9	14.6	4	10.8		21	200	5.08	42
		33.4	17.6	7.58	4.26	0.044	35	65.2	18.9	19.5	1.1	1490	267	54	19.8	143	19.9	6	29		13	1030	11.2	76
		37.9	26	2	3.4	0.048	173	46.7	11.1	12.9	1.3	2410	284	24	12.9	114	9.9	3	24.2		20	2920	23	57
		36.5	22.6	0.669	1.74	0.035	190	45	12.2	7.7	0.7	2530	184	30	9.26	64.6	5.2	2	16.9	0.2	16	1210	25.7	55
		36	23.1	2.32	2.33	0.044	108	75.4	13.8	10.2	0.9	2320	216	27	12.4	74.8	8.8	3	24		17	2170	26.1	60
		34.6	17.4	0.751	3.79	0.046	127	2.4	4.4	12.2	1	4280	217	15	8.98	177	18.1	5	38.9		17	5030	18.5	41
		40.2	29.1	2.7	3.59	0.054	119	4	4.2	9.8	1.7	5800	408	18	7.07	157	16.1	6	41.3		21	5280	20.1	122
		41.8	28.3	2.06	8.83	0.073	158	4.7	3.6	27.9	2.5	7240	526	20	12.6	373	32.2	10	60.5	0.2	16	8320	29.4	91
		32.7	15.7	1.68	8.41	0.295	120	0.4	4.7	26.4	0.9	4260	217	16	26.4	298	25	10	71.5		21	7070	26.3	51
		30.3	12.6	1.24	7.29	0.066	135	0.4	5.4	23.8	0.9	3160	190	14	11.3	244	19.4	8	33.3	0.2	25	5160	18.5	46
		37.7	16.3	4.15	39.7	3.25	329	0.6	5.2	82.5	5.4	1180	1090	5	326	1600		2	79.5	0.6	1470	1910	10	717
		37.7	18.5	3.05	34.1	4.23	335	1.6	5	58.9	5.5	1820	1230	7	276	1220		1	102	0.9	1180	1870	8.07	935
		37.9	19.7	2.48	27.9	3.12	333	0.6	7.4	28.6	6	2710	1160	9	480	921			148	0.9	16600	4890	21.6	1700
		33.1	14.9	2.62	23.7	6.4	241	0.4	5.1	52.6	9.8	3710	1870	10	540	861		2	279	0.9	80600	9240	16.8	975
		37.6	16.1	4.14	38.8	0.976	303	1.2	4.3	72.6	4	1880	713	4	432	1560		3	119	0.4	10100	4060	7.27	933
		31.6	14.4	2.09	19.6	4.35	251	0.5	5	29.7	8.9	3410	1700	7	477	625			271	0.8	131900	6510	15.6	888
		37	14.9	4.31	42.8	0.303	317	0.9	4.9	88.9	2.6	930	468	5	220	1770	0.2	4	53.3	0.2	23	790	3.3	628
		34	14.3	3.74	31.8	5.48	223	0.6	3.7	74	7.9	1450	1520	6	560	1180		3	183	0.6	36500	1880	2.19	511
		33.1	14.3	2.97	25.8	3.19	239	1.2	4.8	53.8	6.5	2390	1250	8	422	1000		2	176	0.6	81800	5670	8.16	943
		31.4	10.3	4.7	41.6	0.717	344	2.8	3.6	110	3.4	624	845	3	227	2140	0.2	5	38.3	0.3	12	1190	3.17	284
		28.8	8.2	3.22	26.9	1.71	218	1.4	2.1	85.6	5.5	971	1260	5	159	1220		3	54	0.3	19	1030	1.28	243
		28.8	8.8	2.6	22.5	1.08	218	1.8	4.6	52.9	5.6	1560	1440	9	245	946			124	0.6	13	2120	4.51	386
		36.2	14	5.76	44.3	0.224	313	0.8	3.4	95.2	2.7	868	528	6	217	1820	0.3	6	43.9	0.3	651	1120	4.93	548
		29.4	8.8	2.14	22.5	3.76	223	0.2	5.7	58.6	6.3	1600	1300	9	341	934		3	143	0.8	69500	3260	8.78	597

## Sheet: References
1	Halbach et al. (1993) Economic Geology, 88, 2210-2225.
2	Hanningtno et al. (2005) Economic Geology, 100, 111-141.
3	Monecke et al. (2014) Economic Geology, 109, 2079-2101.
4	Fouquet et al. (1993) Economic Geology, 1993, 2154-2181.
5	Herzig et al. (1993) Economic Geology, 88, 2182-2209.
6	Evans et al. (2017) Geochimica et Cosmochimica Acta, 215, 214-246.
7	Dekov et al. (2016) Chemical Geology, 438, 36-57.
8	Yeats et al. (2014) Economic Geology, 109, 2207-2226.
9	Petersen et al. (2005) Marine Georesources and Geotechnology, 23, 175-193.
10	Fouquet et al. (2018) Ore Geology Reviews, 99, 314-343.
11	Anderson et al. (2019) Economic Geology, 114, 857-896.
12	Keith et al. (2021) Ore Geology Reviews, 135, 104211.
